# Supplementary material for: Effects of Nd-modification on the activity and SO2 resistance of MnOx/TiO2 catalysts for low-temperature NH3-SCR
Source: Royal Society of Chemistry journal article supplement (doi:10.1039/c8nj02189a), 2018-01-01
Supplement: c8nj02189a1.pdf [file c8nj02189a1.pdf]

## Supplementary material

### **Effects of Nd-modification on the activity and SO<sub>2</sub> resistance of MnO<sub>x</sub>/TiO<sub>2</sub> catalyst for low-temperature NH<sub>3</sub>-SCR**

Hongfeng Chen <sup>a</sup>, Yang Xia <sup>a</sup>, Ruyi Fang <sup>a</sup>, Hui Huang <sup>a</sup>, Yongping Gan <sup>a</sup>, Chu Liang

<sup>a</sup>, Jun Zhang <sup>a</sup>, Wenkui Zhang <sup>a, \*</sup>, Xuesong Liu <sup>b, c, \*</sup>

<sup>a</sup> *College of Materials Science and Engineering, Zhejiang University of Technology,  
Hangzhou, 310014, China.*

<sup>b</sup> *College of Chemistry and Chemical Engineering, Shaoxing University, Shaoxing  
312000, China*

<sup>c</sup> *Zhejiang Hailiang Ecological Materials Co., Ltd, Zhuji, 311835, China*

<sup>\*</sup> *Corresponding authors & E-mail addresses: msechem@zjut.edu.cn (W. K. Zhang),  
xuesongliu@usx.edu.cn (X. S. Liu)*

Tables:

Table S1 The comparative low temperature SCR performance and SO<sub>2</sub> resistance of rare earth metal-modified MnO<sub>x</sub>/TiO<sub>2</sub> catalysts.

Figures:

Fig. S1 The N<sub>2</sub> selectivity of MnTi and MnNdTi catalysts.

Fig. S2 Ti 2*p* (XPS) spectra of fresh and used catalysts.

Fig. S3 Nd 3*d* (XPS) spectra of fresh and used catalysts.

Fig. S4 S 2*p* (XPS) spectra of fresh and used catalysts.

Table S1 The comparative low temperature SCR performance and SO<sub>2</sub> resistance of rare earth metal-modified MnO<sub>x</sub>/TiO<sub>2</sub> catalysts.

| Metals for modification | Preparation method      | Reaction conditions                                                                                                                            | NO <sub>x</sub> conversion | The decreased activity                                                                      | Ref.      |
|-------------------------|-------------------------|------------------------------------------------------------------------------------------------------------------------------------------------|----------------------------|---------------------------------------------------------------------------------------------|-----------|
| Nd                      | Coprecipitation         | GHSV = 50000 h <sup>-1</sup> ; 500 ppm<br>NO; 500 ppm NH <sub>3</sub> ; 5% O <sub>2</sub> ; 10%<br>H <sub>2</sub> O; N <sub>2</sub> balance    | 99 %@210 °C                | From 99 % to 20 % in 6 h<br>(50 ppm SO <sub>2</sub> & 210 °C)                               | This work |
| Ce                      | Sol-Gel                 | GHSV = 40000 h <sup>-1</sup> ; 1000 ppm<br>NO; 1000 ppm NH <sub>3</sub> ; 3 % O <sub>2</sub> ; 3<br>% H <sub>2</sub> O; N <sub>2</sub> balance | 100 %@250 °C               | From 100 % to 84 % in 6.5 h<br>(50 ppm SO <sub>2</sub> & 210 °C)                            | 8, 9, 10  |
| Eu                      | Sol-Gel                 | GHSV = 108000 h <sup>-1</sup> ; 600 ppm<br>NO; 600 ppm NH <sub>3</sub> ; 5 % O <sub>2</sub> ; 5 %<br>H <sub>2</sub> O; Ar balance              | 98 %@250 °C                | From 85 % to 70.1 % in 25 h<br>(100 ppm SO <sub>2</sub> & 150 °C)                           | 23, 24    |
| Y                       | Sol-Gel                 | GHSV = 14000 h <sup>-1</sup> ; 600 ppm<br>NO; 600 ppm NH <sub>3</sub> ; 3 % O <sub>2</sub> ; N <sub>2</sub><br>balance                         | 95 %@180 °C                | N.A.                                                                                        | 25        |
| Ho (Fe)                 | Impregnation            | GHSV = 20000 h <sup>-1</sup> ; 0.08 % NO;<br>0.08 % NH <sub>3</sub> ; 5 % O <sub>2</sub> ; N <sub>2</sub><br>balance                           | 100 %@160 °C               | From 90 % to 0 in 5 h (0.06<br>% SO <sub>2</sub> & 15 % H <sub>2</sub> O)                   | 21, 22    |
| Sm                      | Inverse coprecipitation | GHSV = 30000 h <sup>-1</sup> ; 500 ppm<br>NO; 500 ppm NH <sub>3</sub> ; 5 % O <sub>2</sub> ; N <sub>2</sub><br>balance                         | 91 %@175 °C                | From 90 % to 73 % in 19 h<br>(100 ppm SO <sub>2</sub> & 2.5 % H <sub>2</sub> O<br>& 200 °C) | 56        |

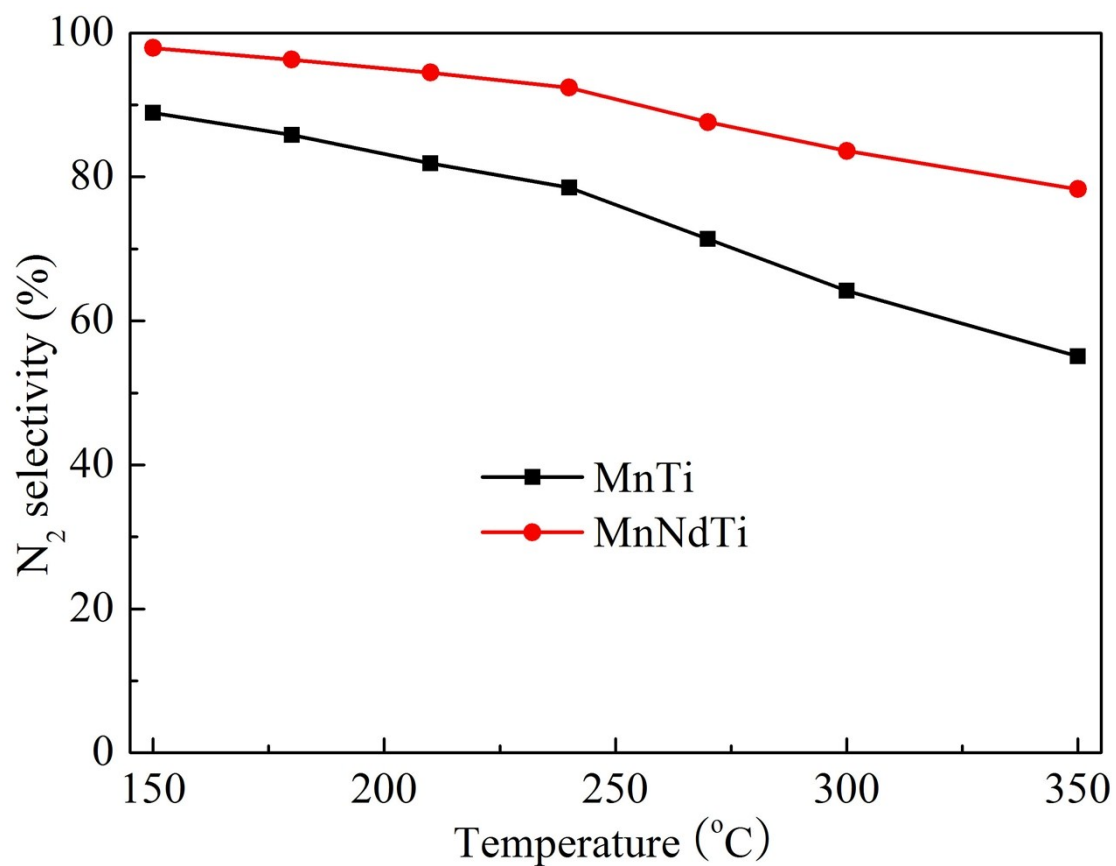

Fig. S1 The N<sub>2</sub> selectivity of MnTi and MnNdTi catalysts.

The N<sub>2</sub> selectivity at each temperature point is calculated according to formulas (1), as follows:

$$N_{2\text{selec.}}(\%) = \left( 1 - \frac{2[N_2O]_{\text{out}}}{[NO_x]_{\text{in}} + [NH_3]_{\text{in}} - [NO_x]_{\text{out}} - [NH_3]_{\text{out}}} \right) \times 100\% \quad (1)$$

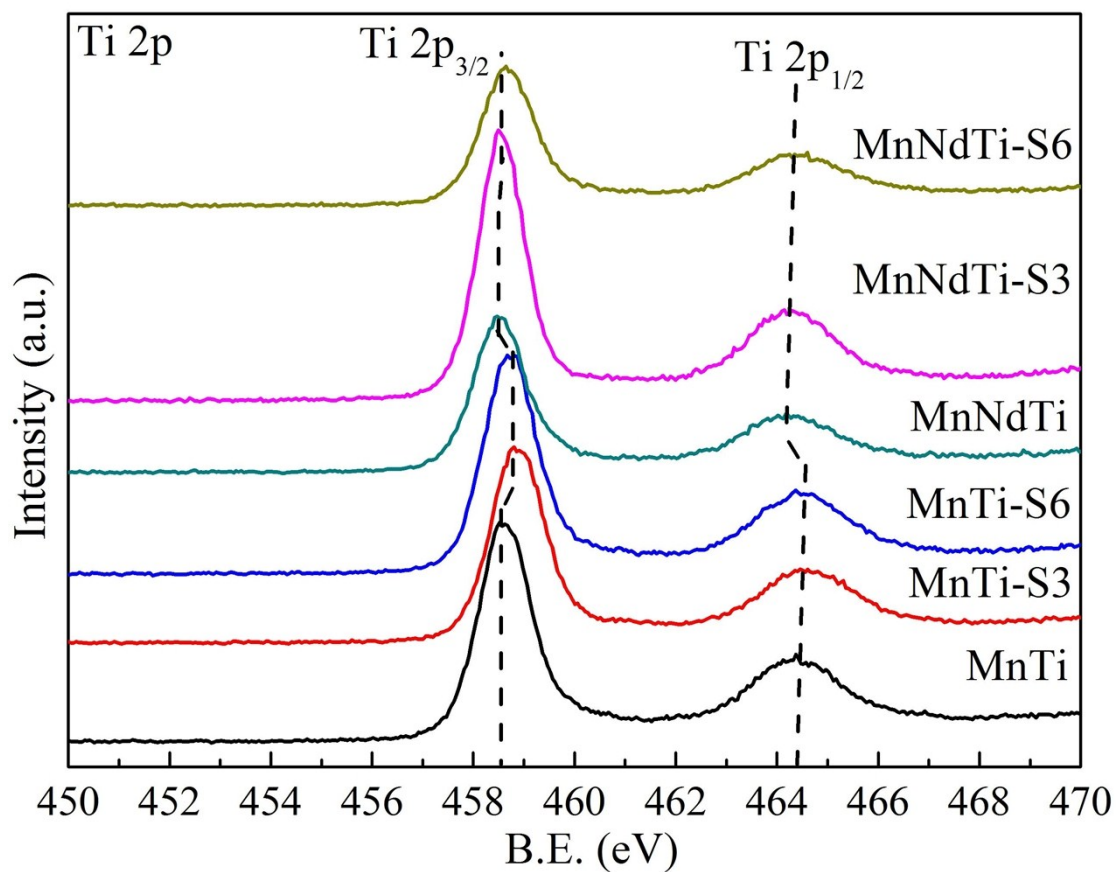

Fig. S2 Ti 2p (XPS) spectra of fresh and used catalysts.

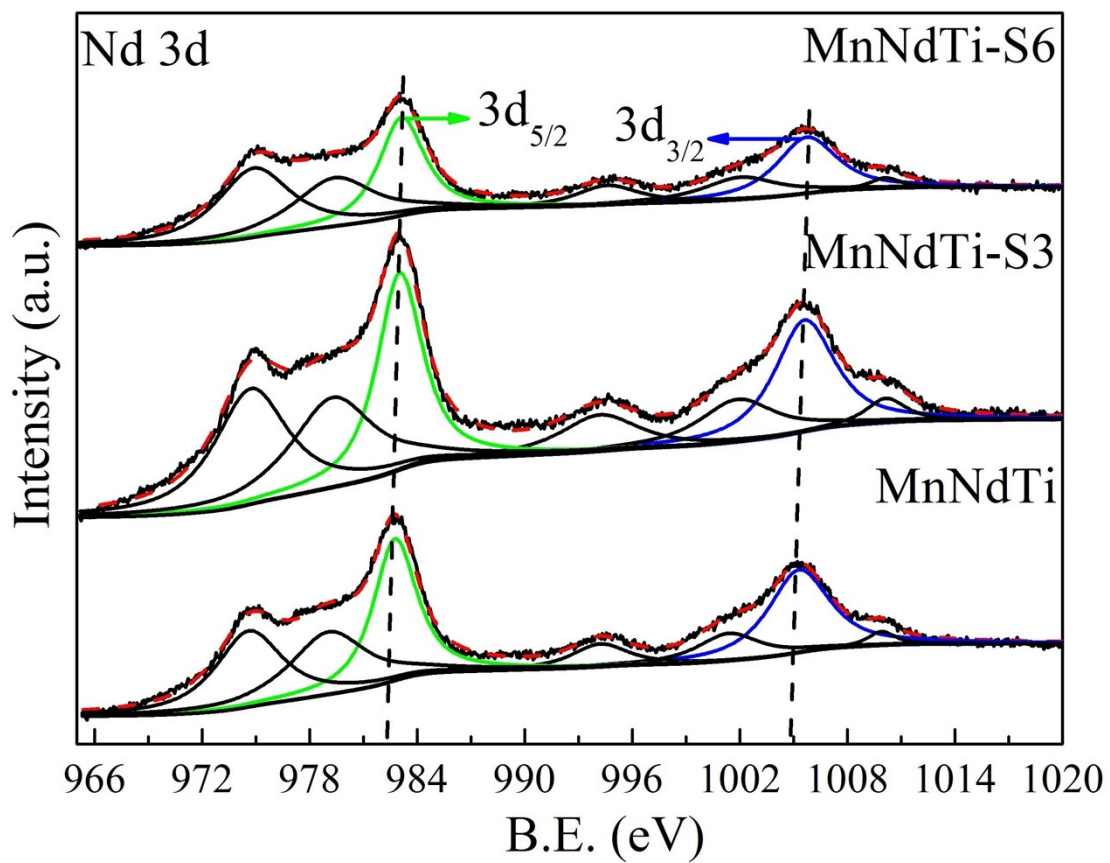

Fig. S3 Nd 3d (XPS) spectra of fresh and used catalysts.

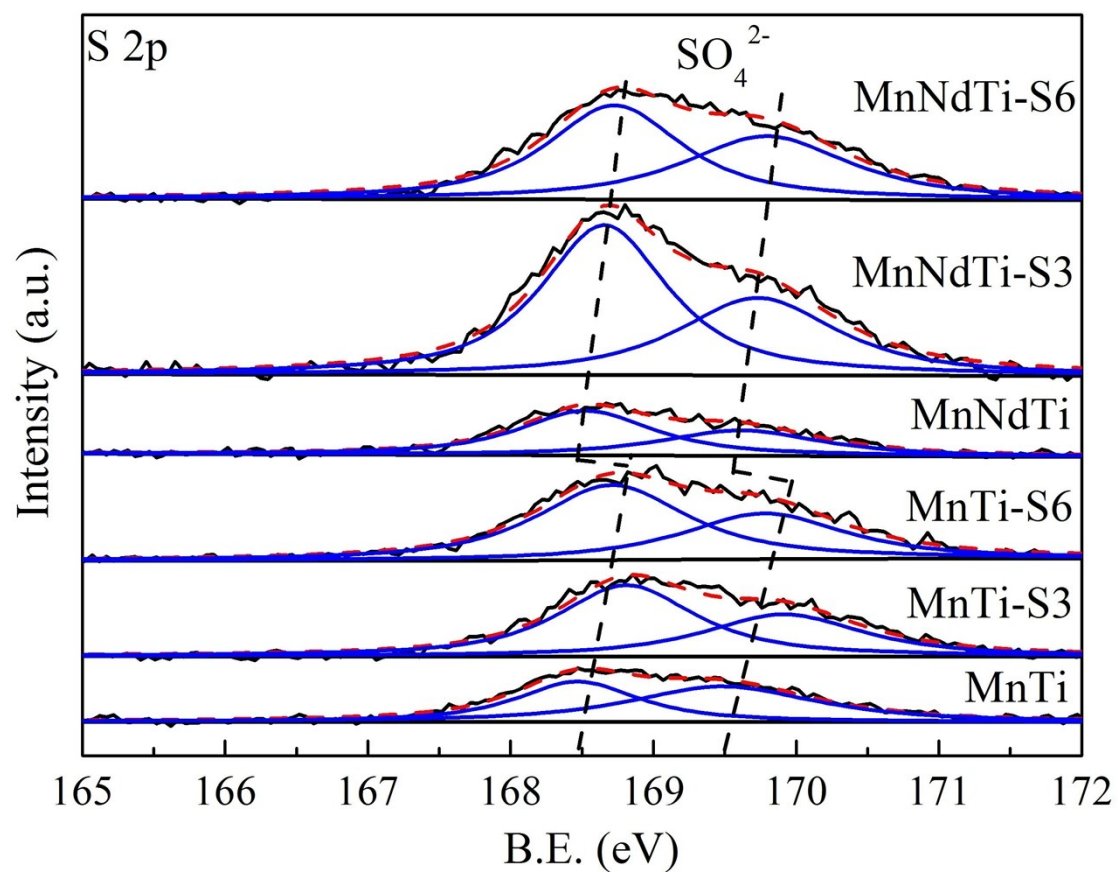

Fig. S4 S 2p (XPS) spectra of fresh and used catalysts.
